# Supplementary material for: Bioparticles coated with an ionic liquid for the pre-concentration of rare earth elements from microwave-digested tea samples and the subsequent quantification by ETV-ICP-OES
Source: Royal Society of Chemistry journal article supplement (doi:10.1039/c6ay02189a), 2016-01-01
Supplement: c6ay02189a1.pdf [file c6ay02189a1.pdf]

## Bioparticles coated with ionic liquid for the pre-concentration of rare earth elements from microwave-digested tea samples and the subsequent quantification by ETV-ICP-OES

Sara Hosseinzadegan<sup>a†</sup>, Winfried Nischkauer<sup>a†</sup>, Katharina Bica<sup>b</sup>, and Andreas Limbeck<sup>a\*</sup>

<sup>a</sup> Institute of Chemical Technologies and Analytics, TU Wien, Getreidemarkt 9/164-IAC, 1060 Vienna, Austria.

<sup>b</sup> Institute of Applied Synthetic Chemistry, TU Wien, Getreidemarkt 9, 1060 Vienna, Austria.

\* Andreas.Limbeck@tuwien.ac.at

### Electronic Supplementary Material

#### Structure and characterization of [P<sub>66614</sub>]<sup>+</sup>[BEHPA]<sup>-</sup>

<sup>1</sup>H and <sup>13</sup>C NMR spectra were recorded from CDCl<sub>3</sub> solutions on a Bruker Advance UltraShield 400 (400 MHz) spectrometer and chemical shifts (δ) are reported in ppm using tetramethylsilane as internal standard. Coupling constants (J) are in Hertz (Hz). The following abbreviations were used to explain the multiplicities: s = singlet, d = doublet, t = triplet, q = quartet, quin = quintet, sext = sextet, m = multiplet, brs = broad.

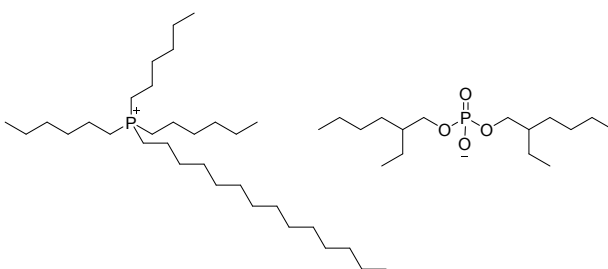

Figure S1. Structure of trihexyltetradecylphosphonium bis(2-ethylhexyl)phosphonate ([P<sub>66614</sub>]<sup>+</sup>[BEHPA]<sup>-</sup>)

<sup>1</sup>H-NMR (400 MHz, CDCl<sub>3</sub>): δ<sub>H</sub> = 3.70 (dd, 4H), 2.39 m (8H), 1.47 (m, 20 H), 1.27-1.21 (m, 46), 0.85 (m, 24H).

<sup>13</sup>C-NMR (400 MHz, CDCl<sub>3</sub>): δ<sub>C</sub> = 67.04, 40.55, 32.00, 31.27, 30.94 (d, J<sub>P-H</sub> = 15.0 Hz), 30.61 (d, J<sub>P-H</sub> = 14.7 Hz), 30.20, 29.77, 29.73, 29.64, 29.44, 29.18, 23.42, 23.28, 22.78, 22.40, 22.06 (d, J<sub>P-H</sub> = 4.6 Hz), 19.13 (d, J<sub>P-H</sub> = 48.5 Hz), 14.24, 14.20, 14.04, 11.11. IR: ν(cm<sup>-1</sup>) = 2956.0, 2923.8, 2855.5, 1462.0, 1378.5, 1244.5, 1044.6, 973.1, 810.3, 723.2.

## Quadrupole ICP-MS method

Comparative measurements were done on an iCAP Qc quadrupole ICP-MS instrument (Thermo, Germany) using a polymeric concentric nebulizer, a glass cyclonic spray-chamber, and a quartz injector tube of 1.5 mm inner diameter. Other conditions were applied as summarized in table S1. Samples were taken up with an ESI SC2-DX autosampler in combination with an ESI FAST sample loop of 1 mL volume. At the beginning of the measurement session, the instrument was tuned for maximum sensitivity ( $^{115}\text{In}$ ), as well as for low oxide ratios (CeO/Ce). The KED modus was operated with an energy barrier of -3V, and a mixture of hydrogen (7%) in helium was used as KED gas.

|                                   |                                                                                                                                                                                                                                                                                                                                                                    |      |
|-----------------------------------|--------------------------------------------------------------------------------------------------------------------------------------------------------------------------------------------------------------------------------------------------------------------------------------------------------------------------------------------------------------------|------|
| <b>Plasma power</b>               | W                                                                                                                                                                                                                                                                                                                                                                  | 1550 |
| <b>Cool gas (Ar)</b>              | L min <sup>-1</sup>                                                                                                                                                                                                                                                                                                                                                | 14   |
| <b>Nebulizer gas (Ar)</b>         | L min <sup>-1</sup>                                                                                                                                                                                                                                                                                                                                                | 0.95 |
| <b>Auxiliary gas (Ar)</b>         | L min <sup>-1</sup>                                                                                                                                                                                                                                                                                                                                                | 0.8  |
| <b>KED-gas (H<sub>2</sub>/He)</b> | mL min <sup>-1</sup>                                                                                                                                                                                                                                                                                                                                               | 4.5  |
| <b>Sample flow rate</b>           | mL min <sup>-1</sup>                                                                                                                                                                                                                                                                                                                                               | 0.5  |
| <b>Cone material</b>              | Nickel                                                                                                                                                                                                                                                                                                                                                             |      |
| <b>Dwell time</b>                 | s                                                                                                                                                                                                                                                                                                                                                                  | 0.01 |
| <b>Nuclides monitored</b>         | $^{45}\text{Sc}$ , $^{89}\text{Y}$ , $^{139}\text{La}$ , $^{140}\text{Ce}$ , $^{141}\text{Pr}$ , $^{143}\text{Nd}$ , $^{147}\text{Sm}$ , $^{151}\text{Eu}$ , $^{155}\text{Gd}$ , $^{159}\text{Tb}$ , $^{163}\text{Dy}$ , $^{165}\text{Ho}$ , $^{166}\text{Er}$ , $^{169}\text{Tm}$ , $^{172}\text{Yb}$ , $^{175}\text{Lu}$ ; $^{115}\text{In}$ (internal standard) |      |
